# Supplementary figures and images for: Conditioning chemotherapy exposure is associated with epigenetic modifications in Clostridioides difficile isolates from stem cell transplant recipients
Source: Research Square preprint supplement (doi:10.21203/rs.3.rs-8865869/v1), 2026-05-05

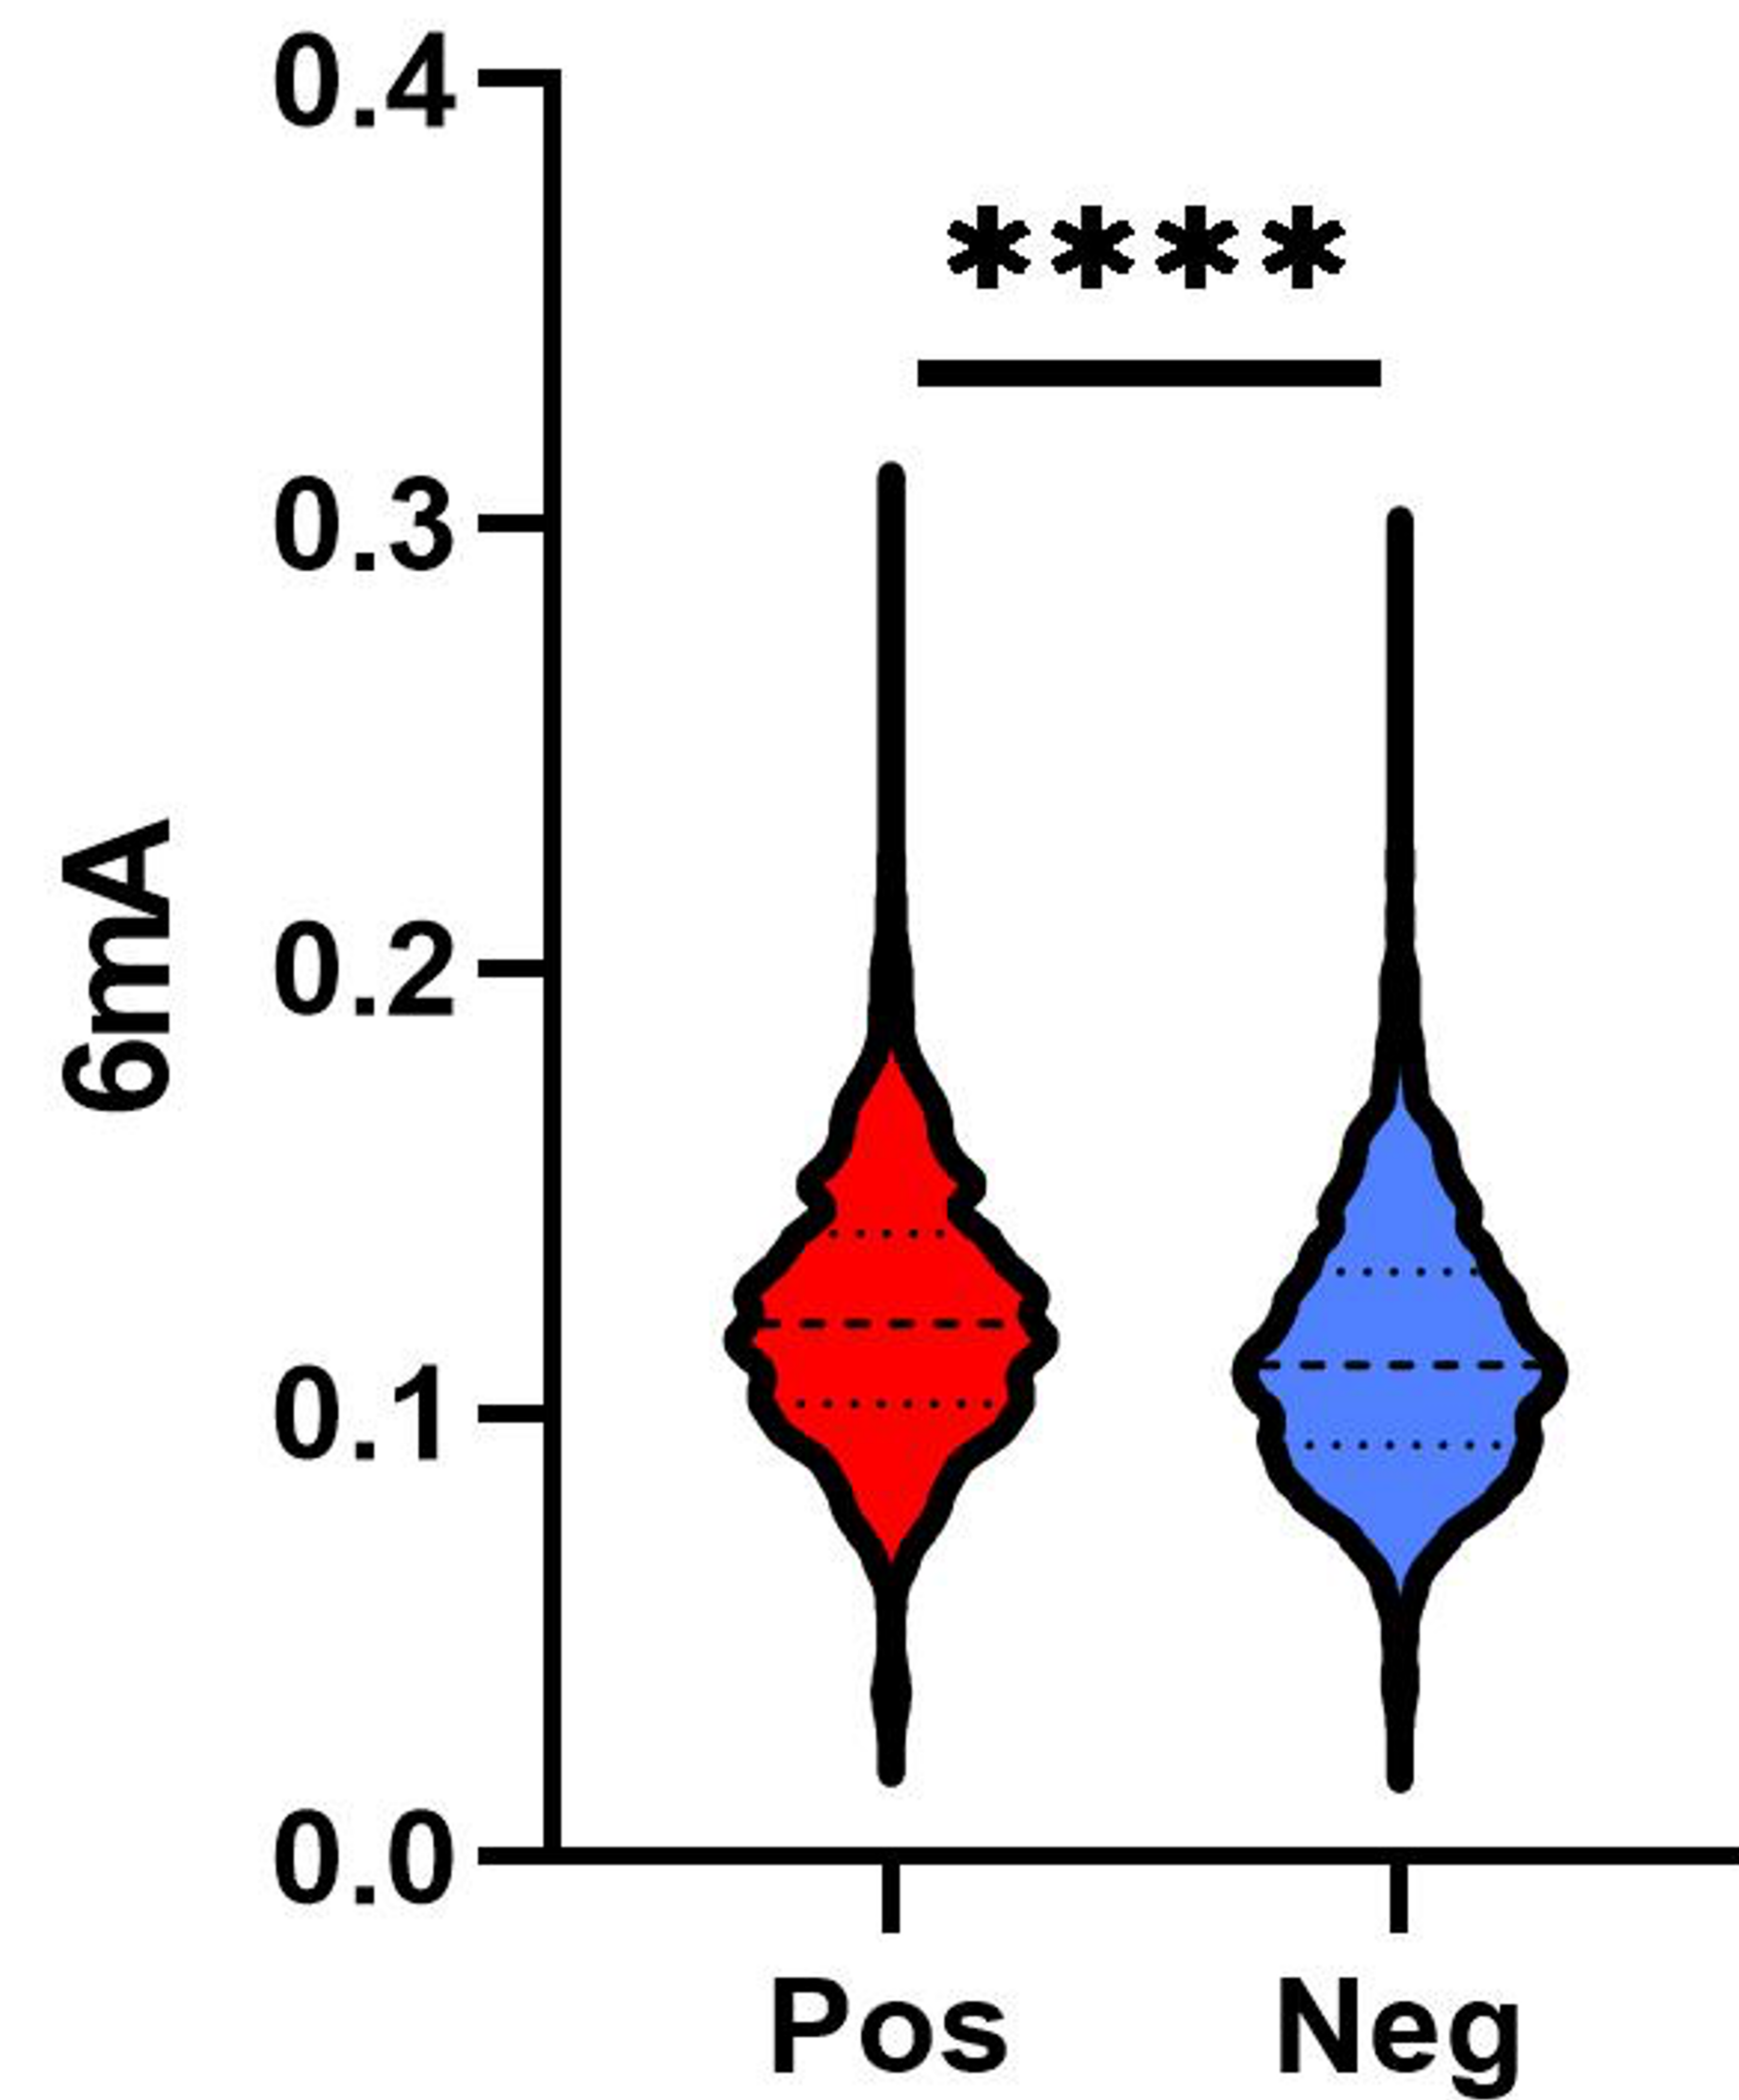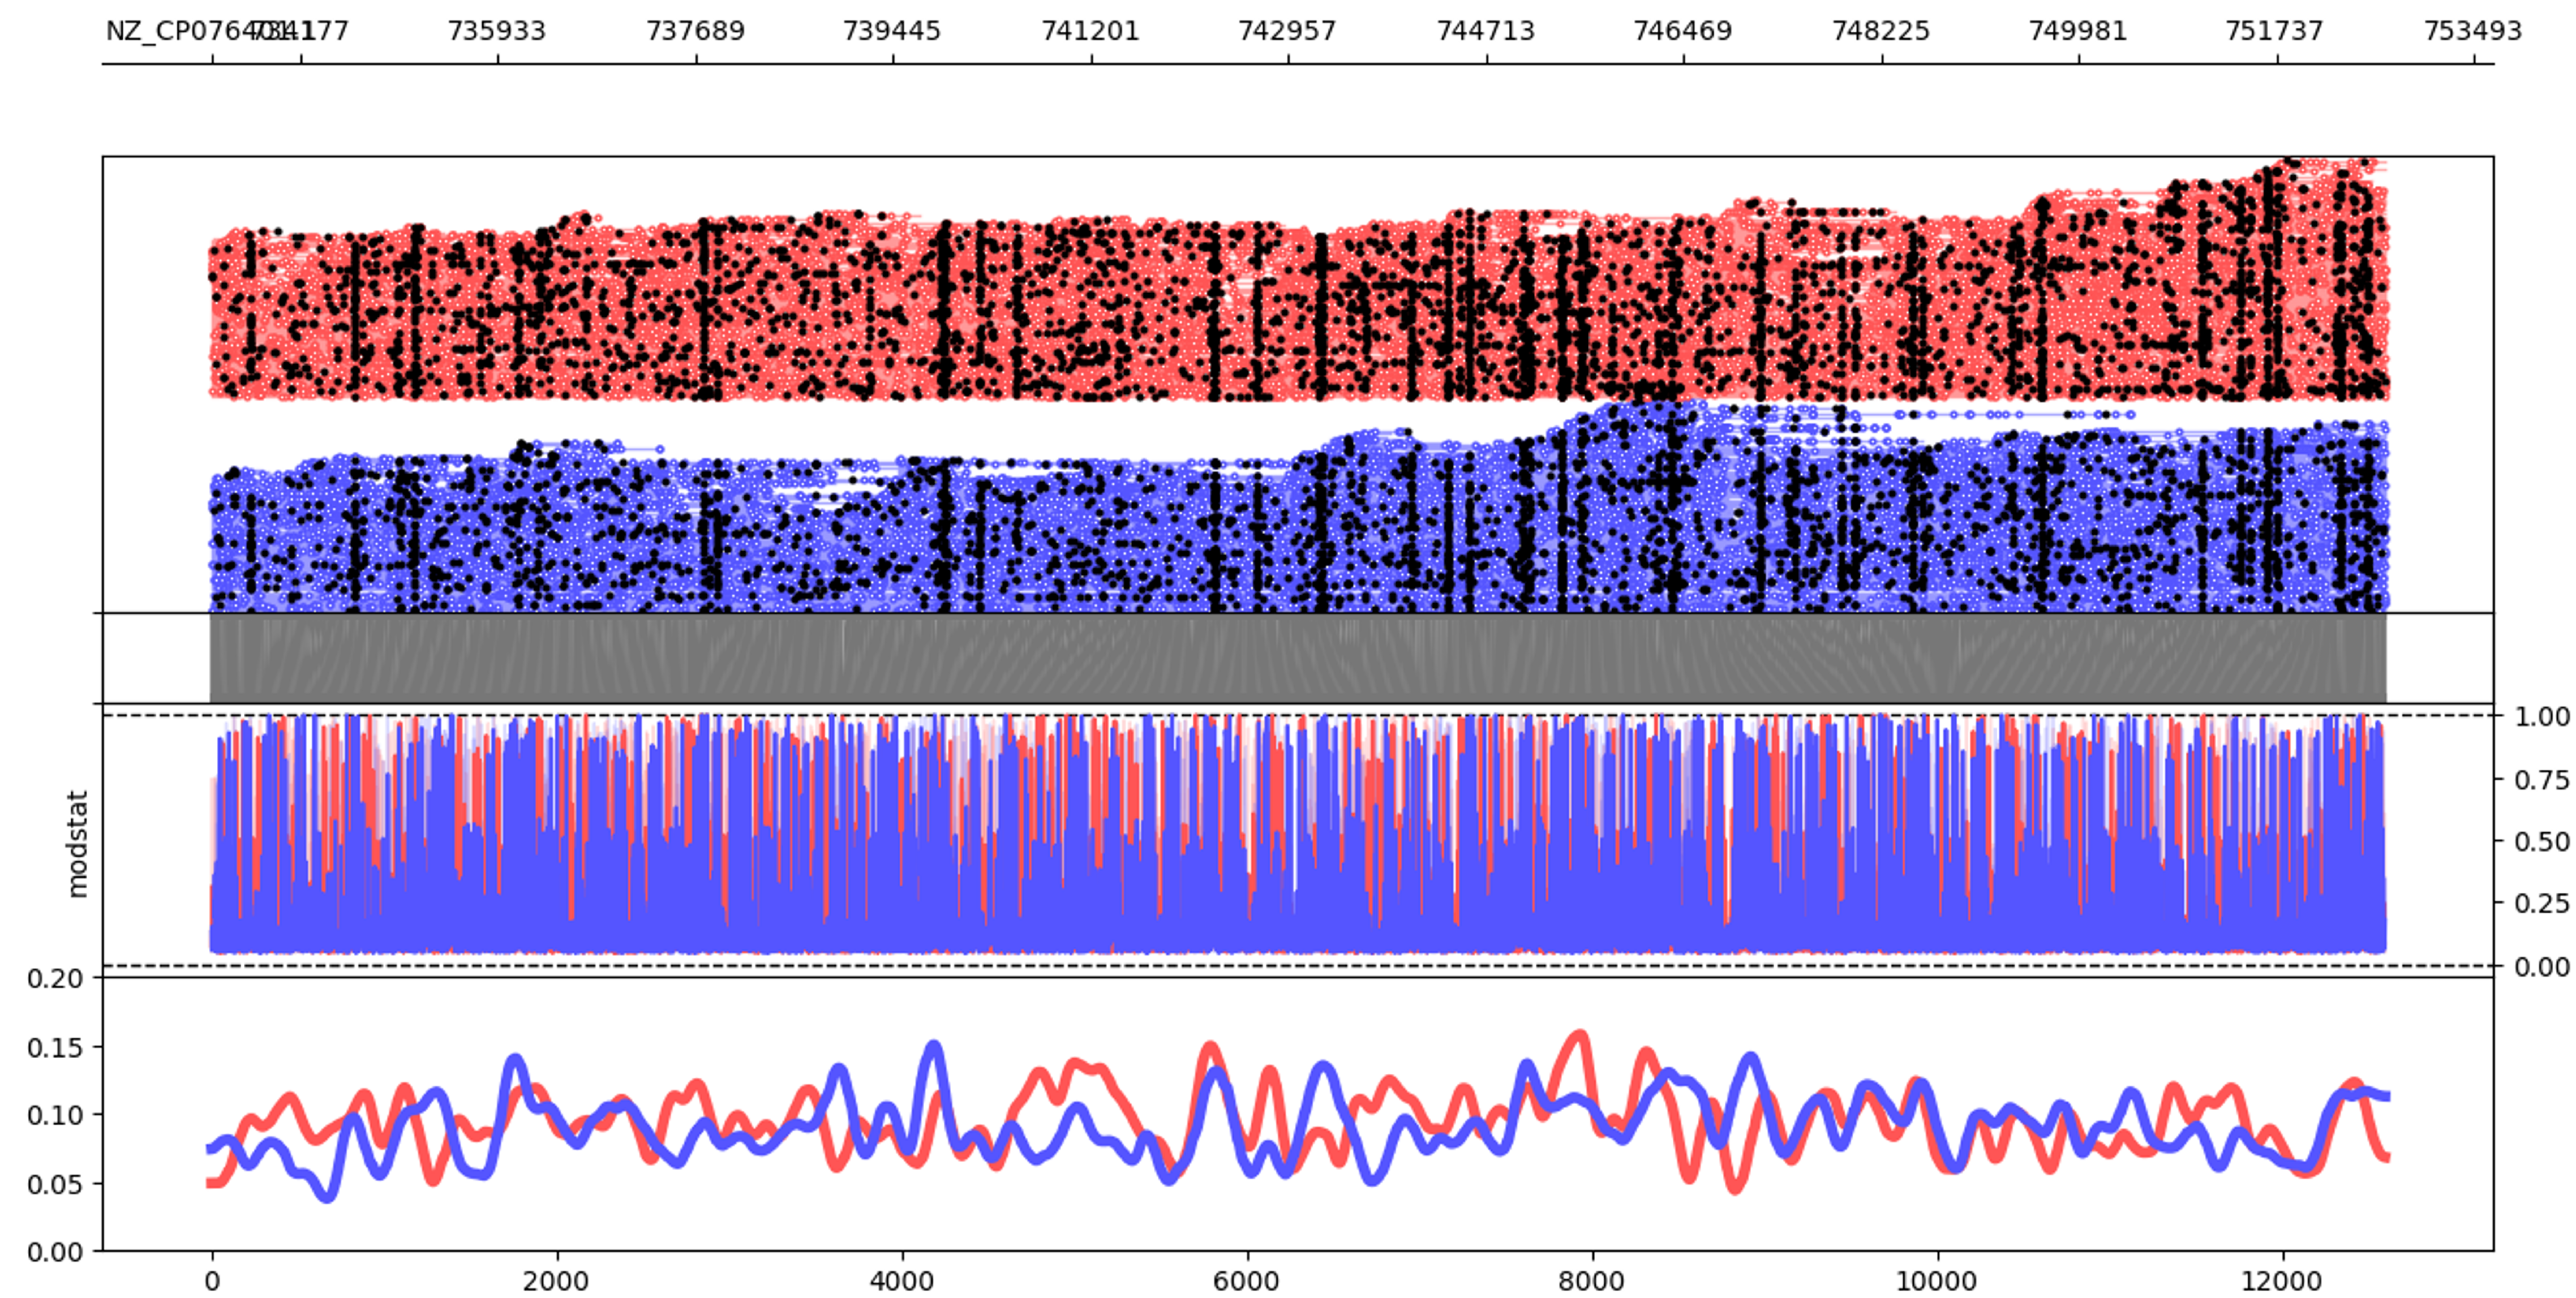

5mC

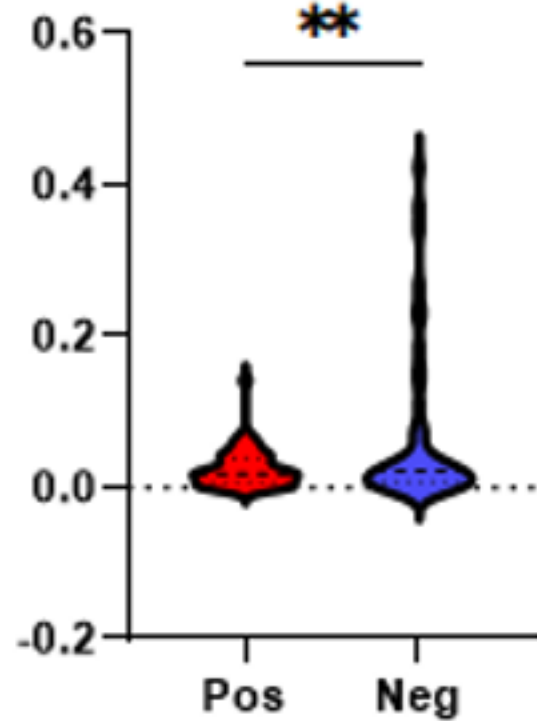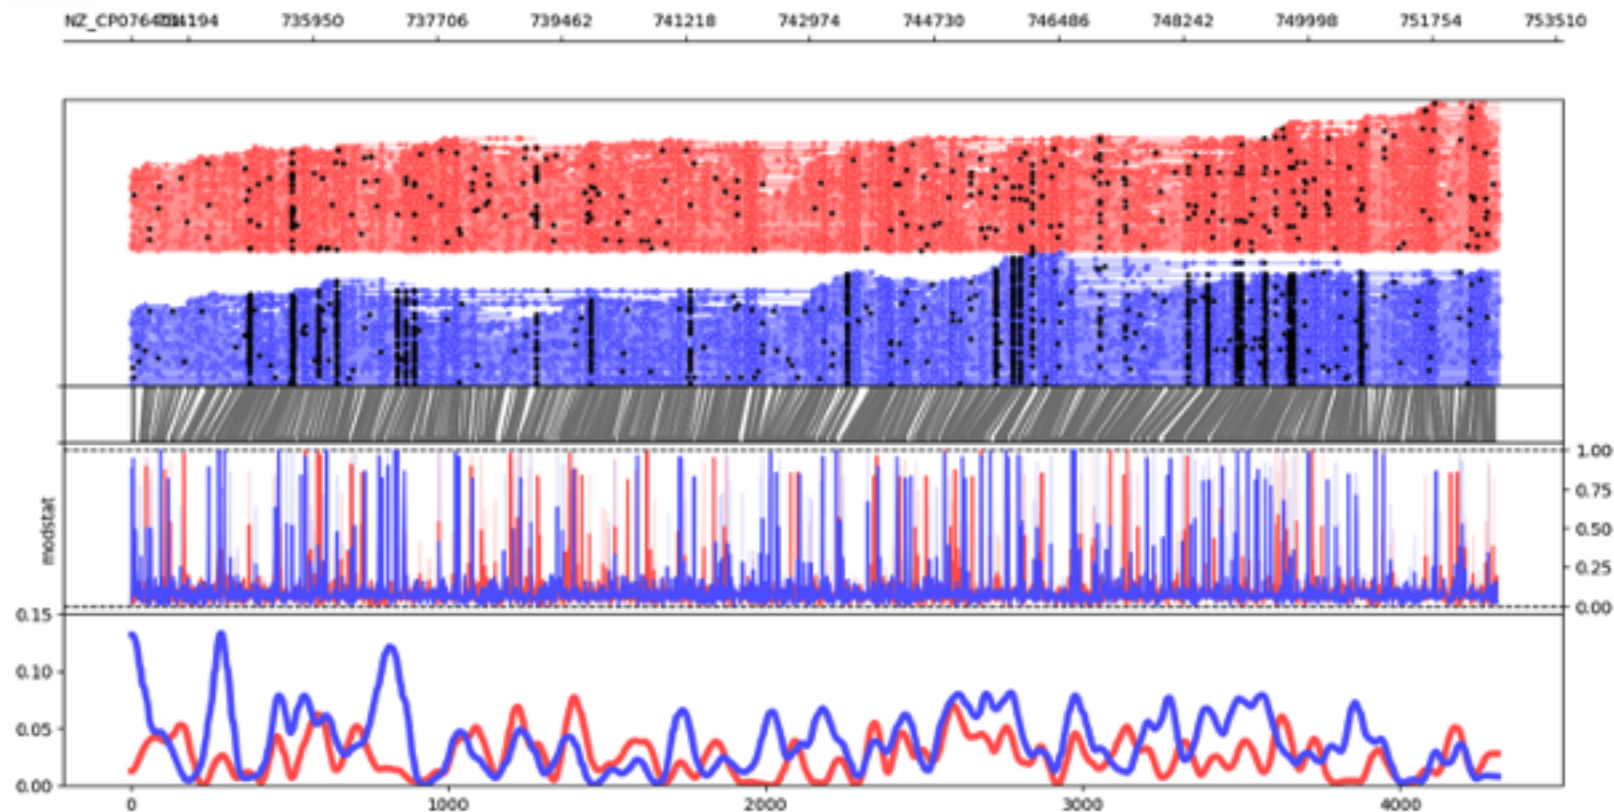

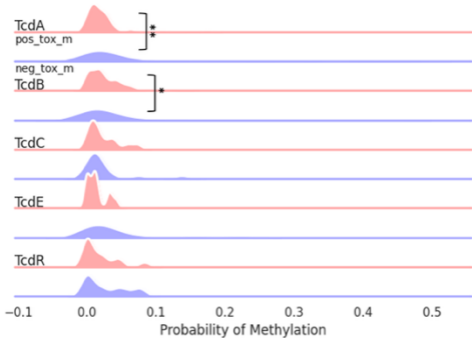

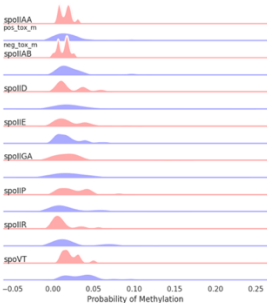

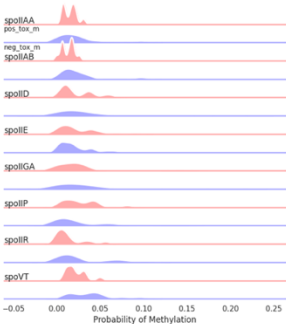

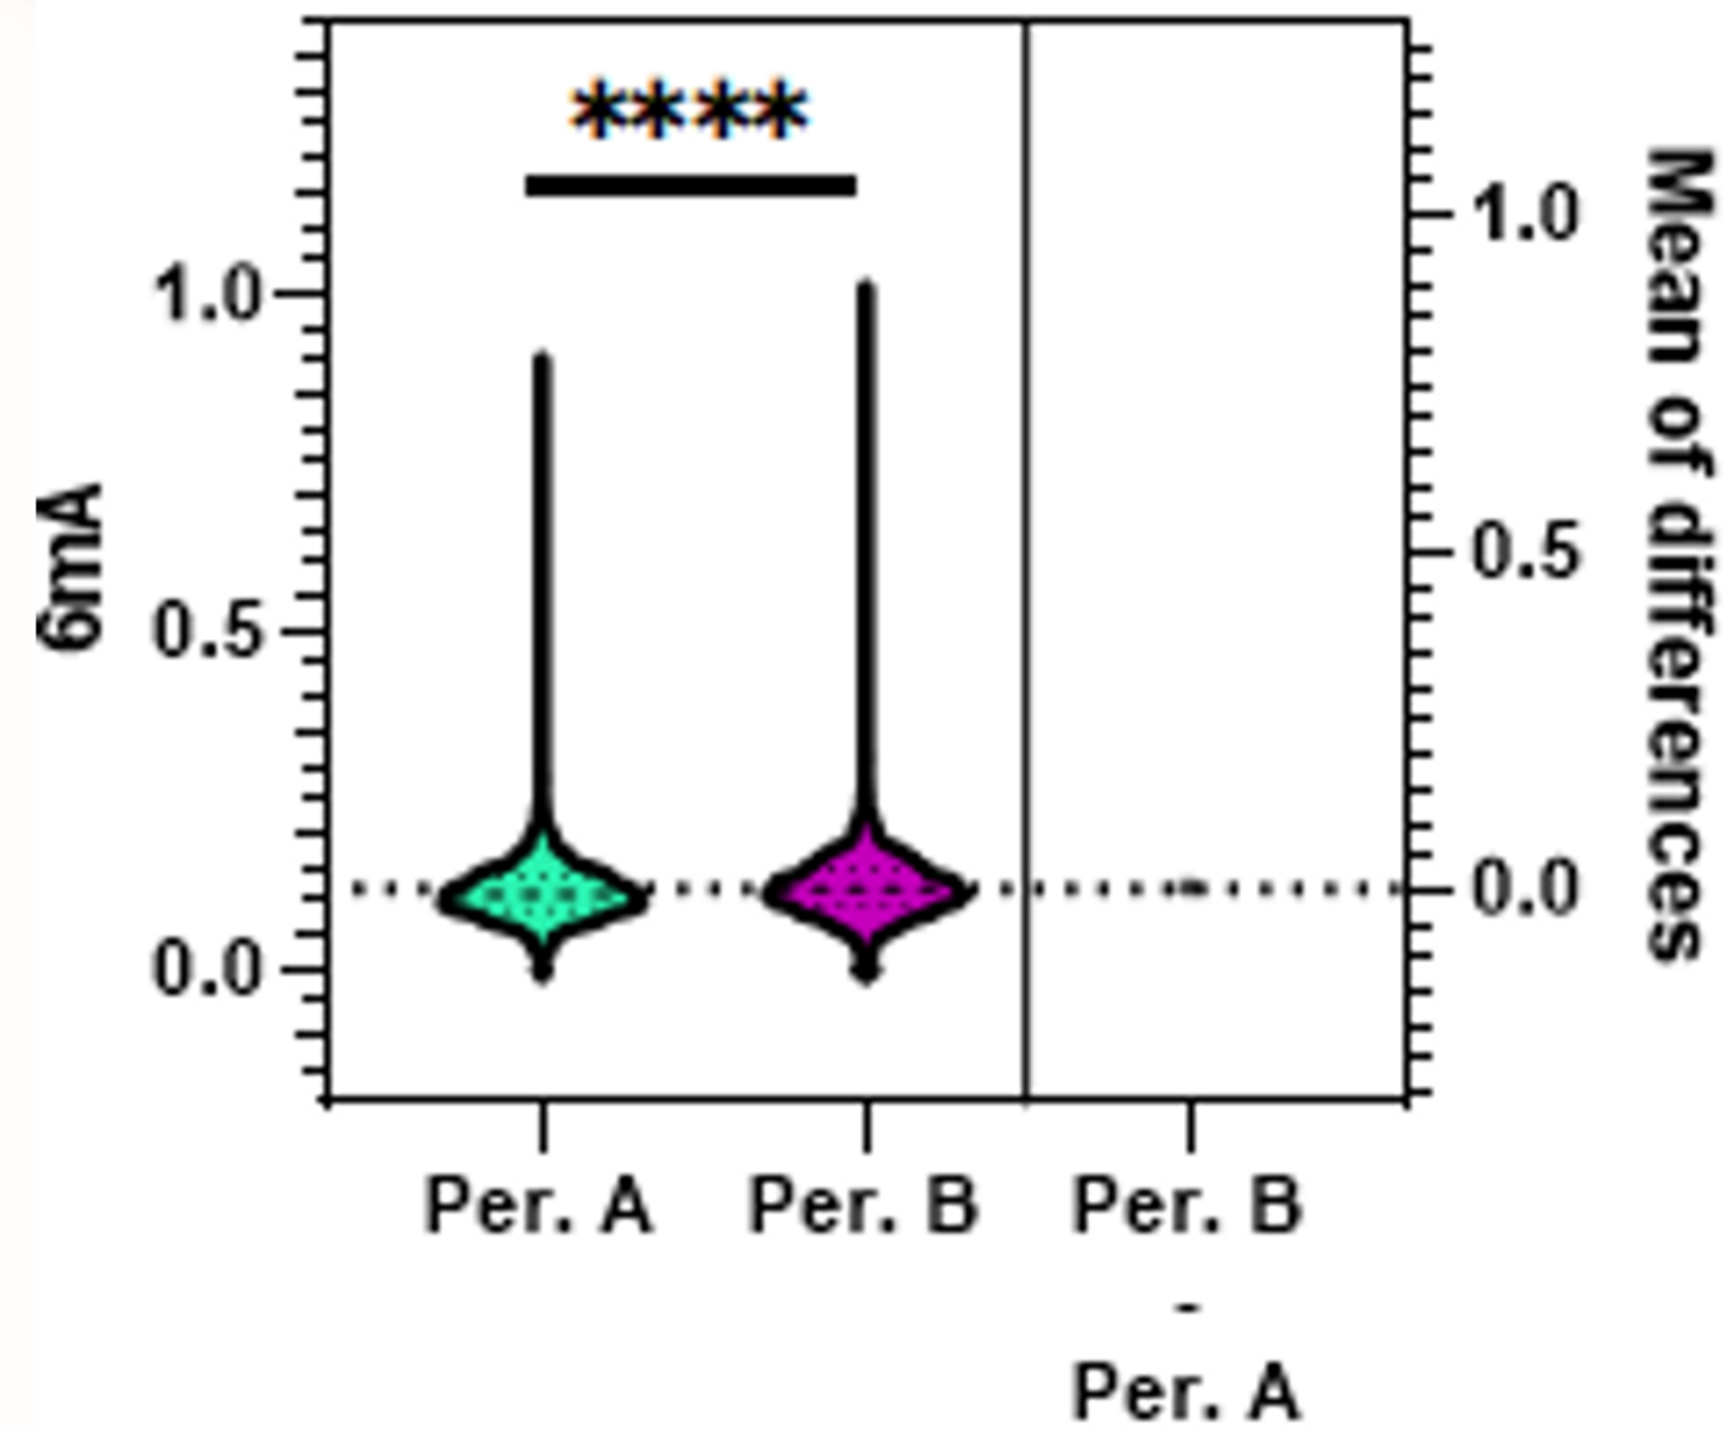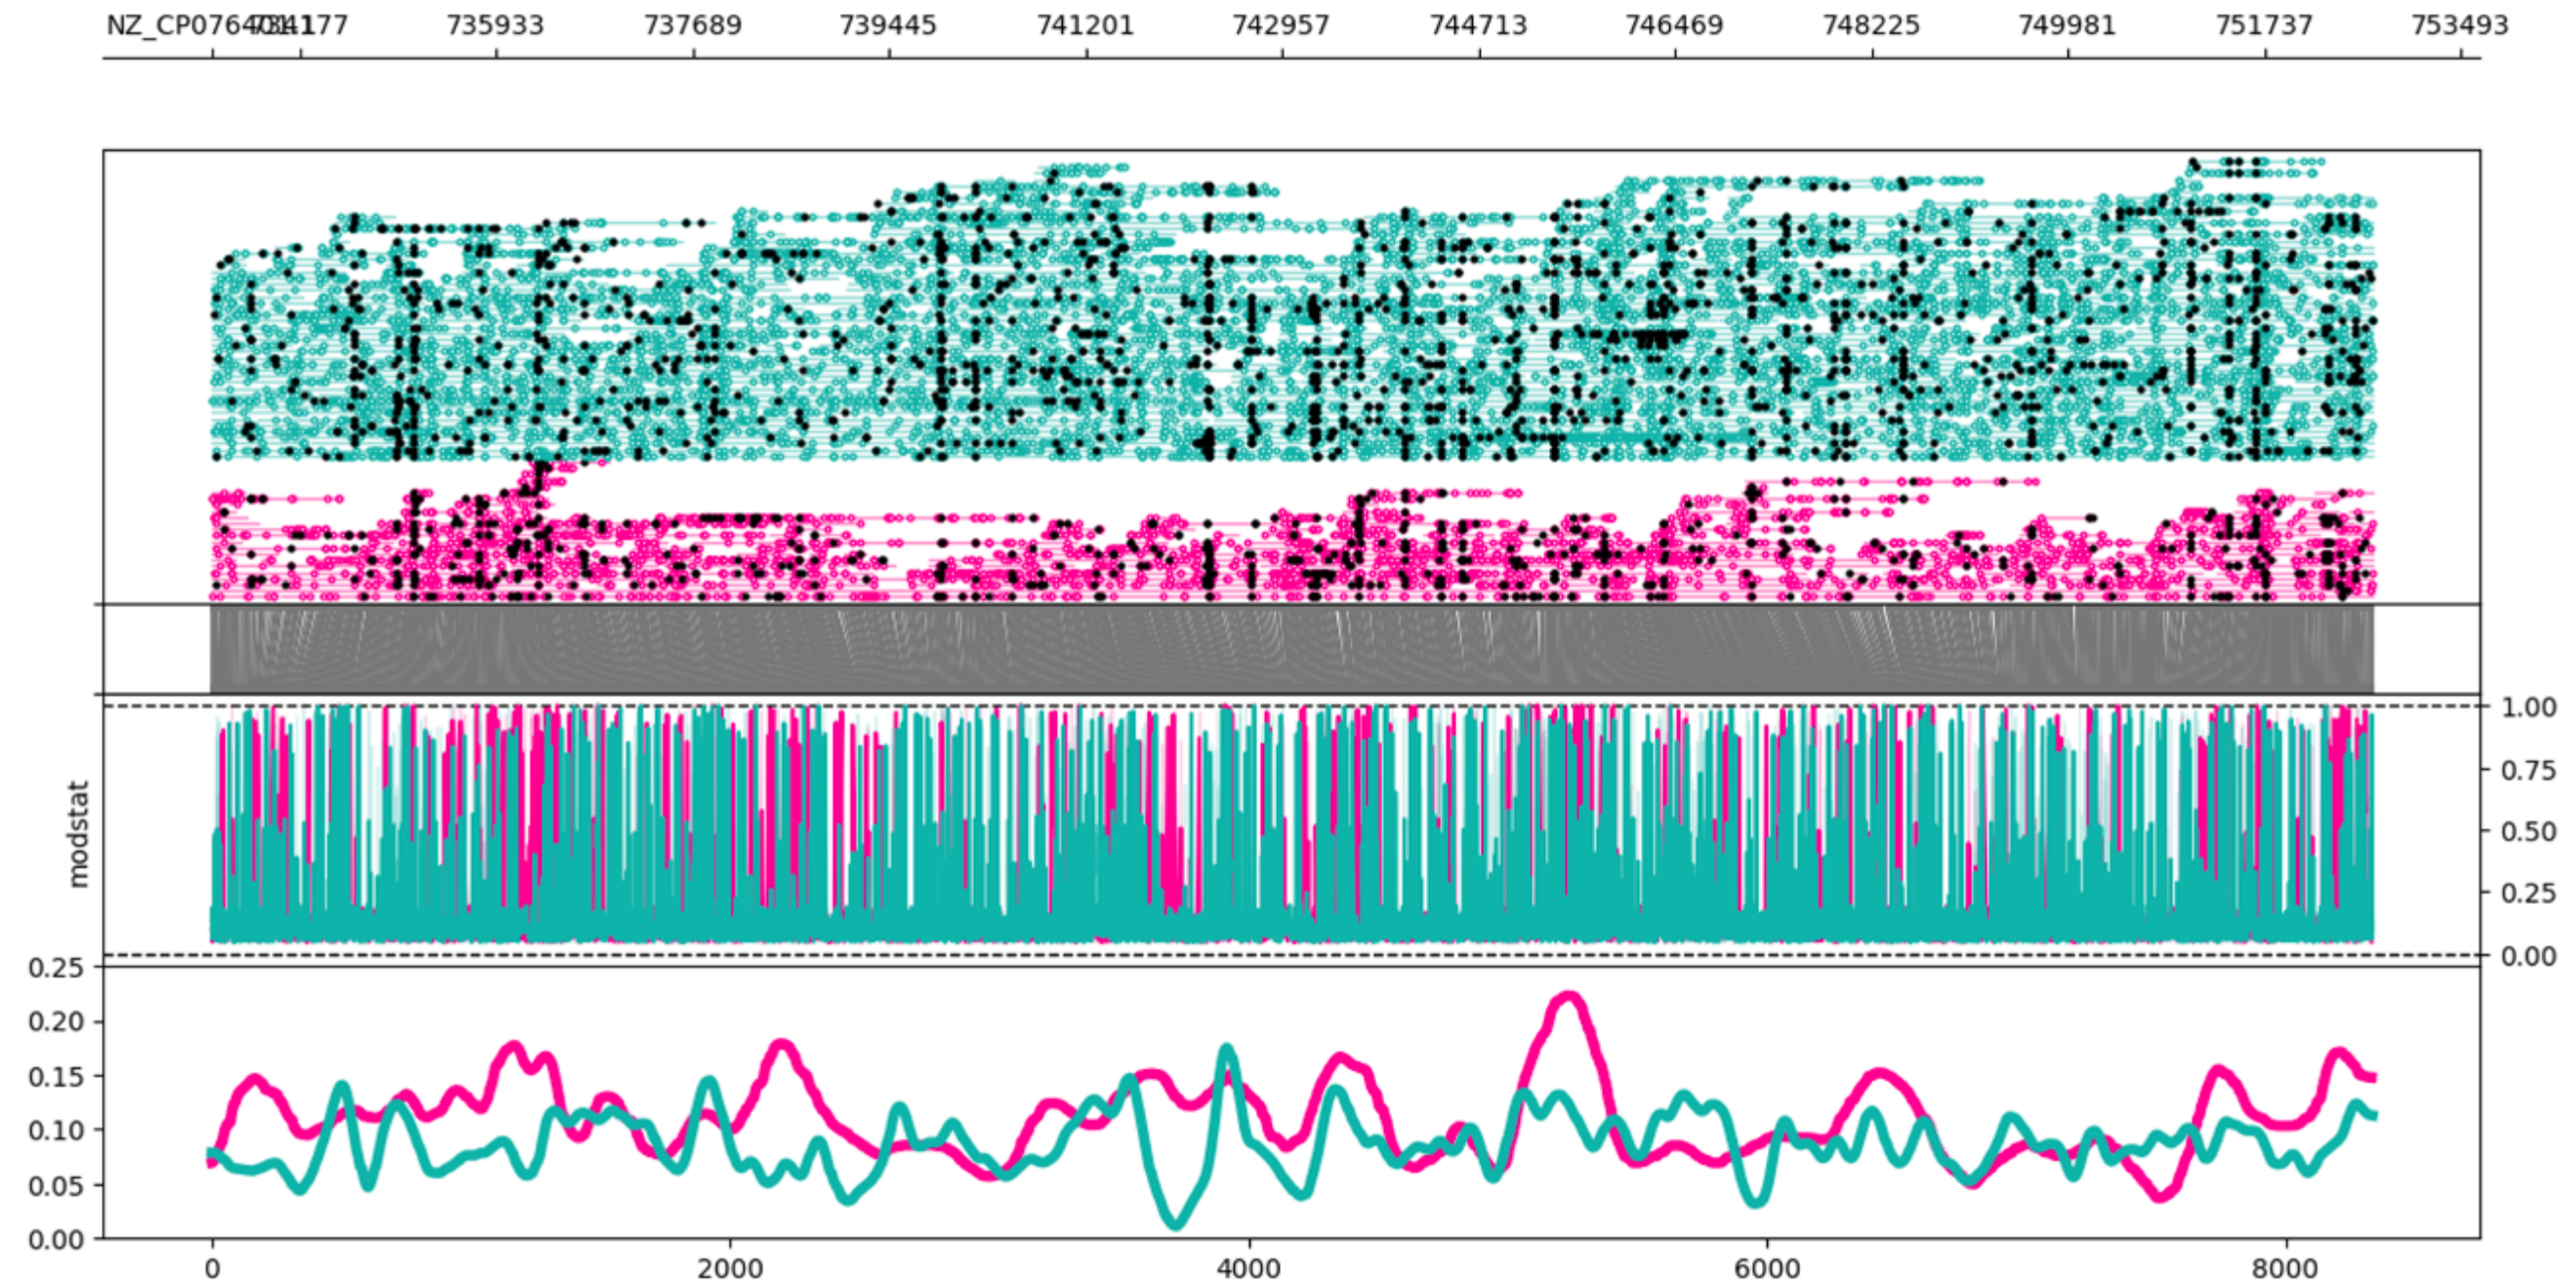

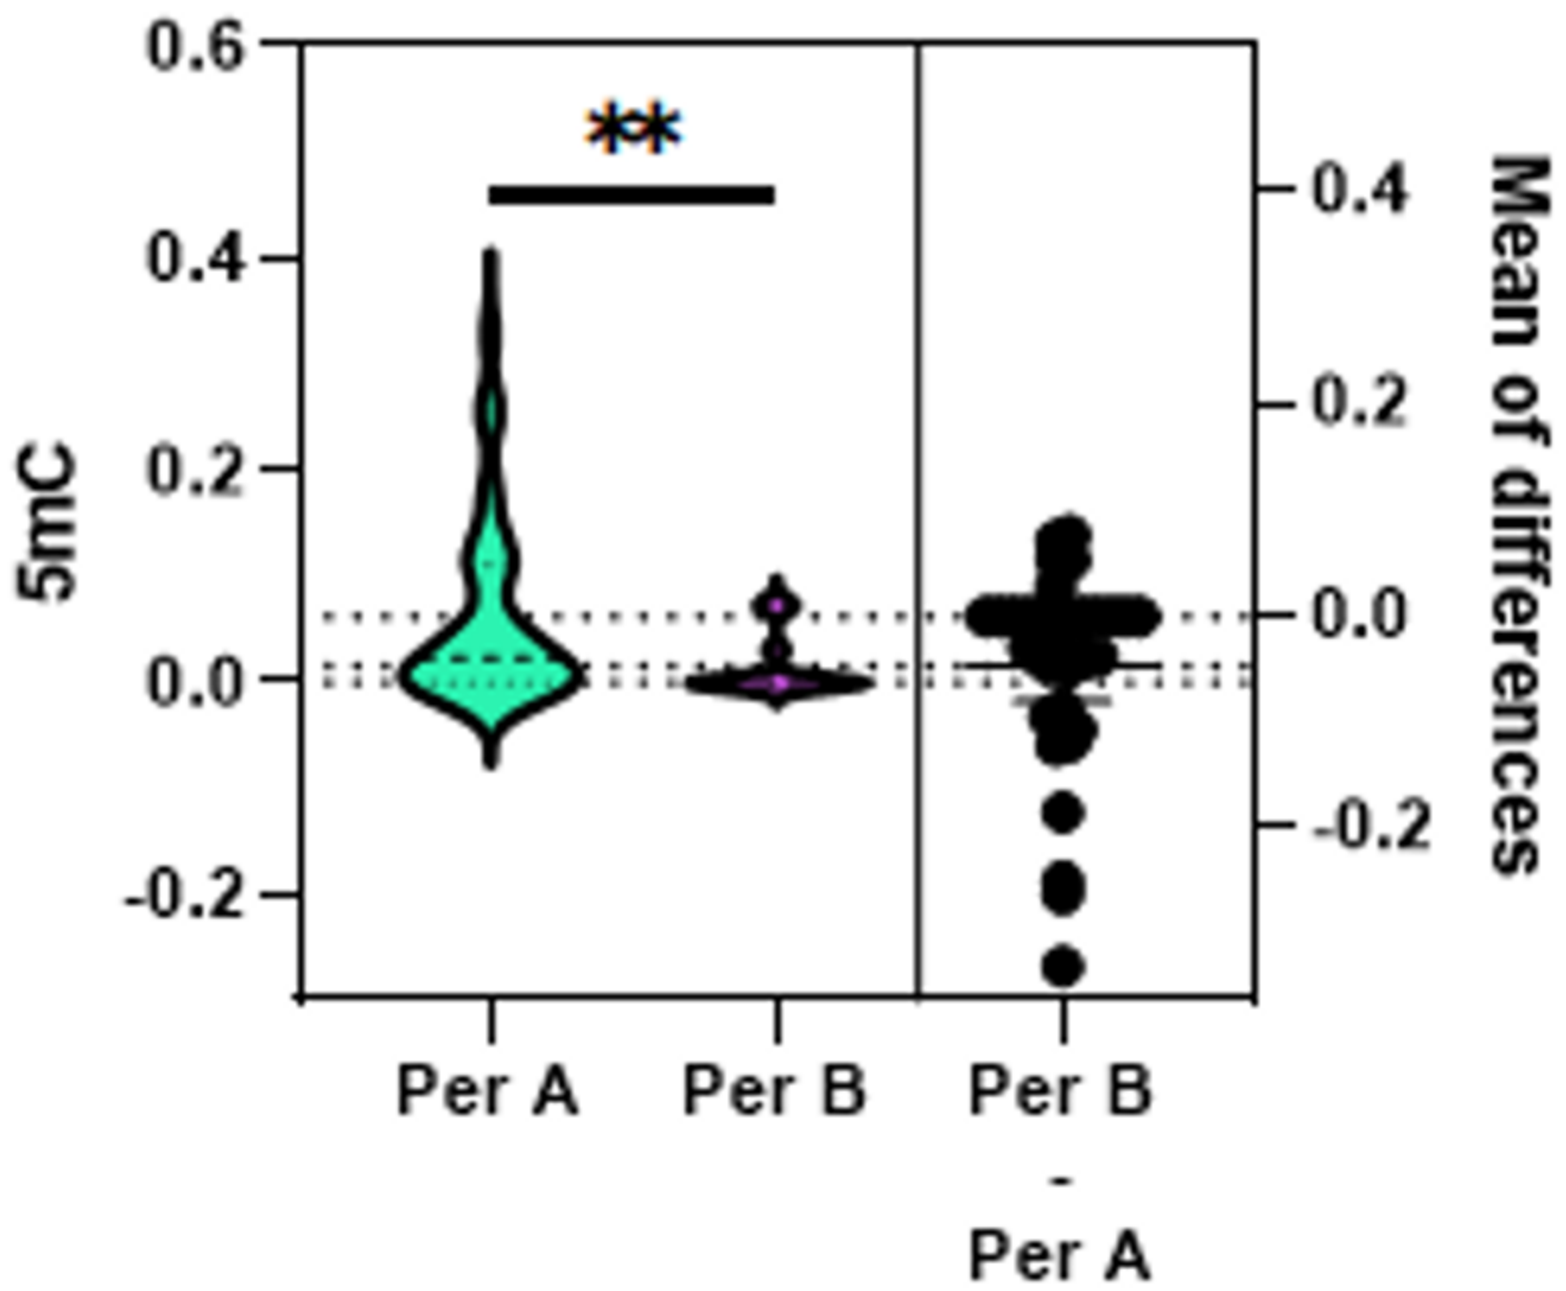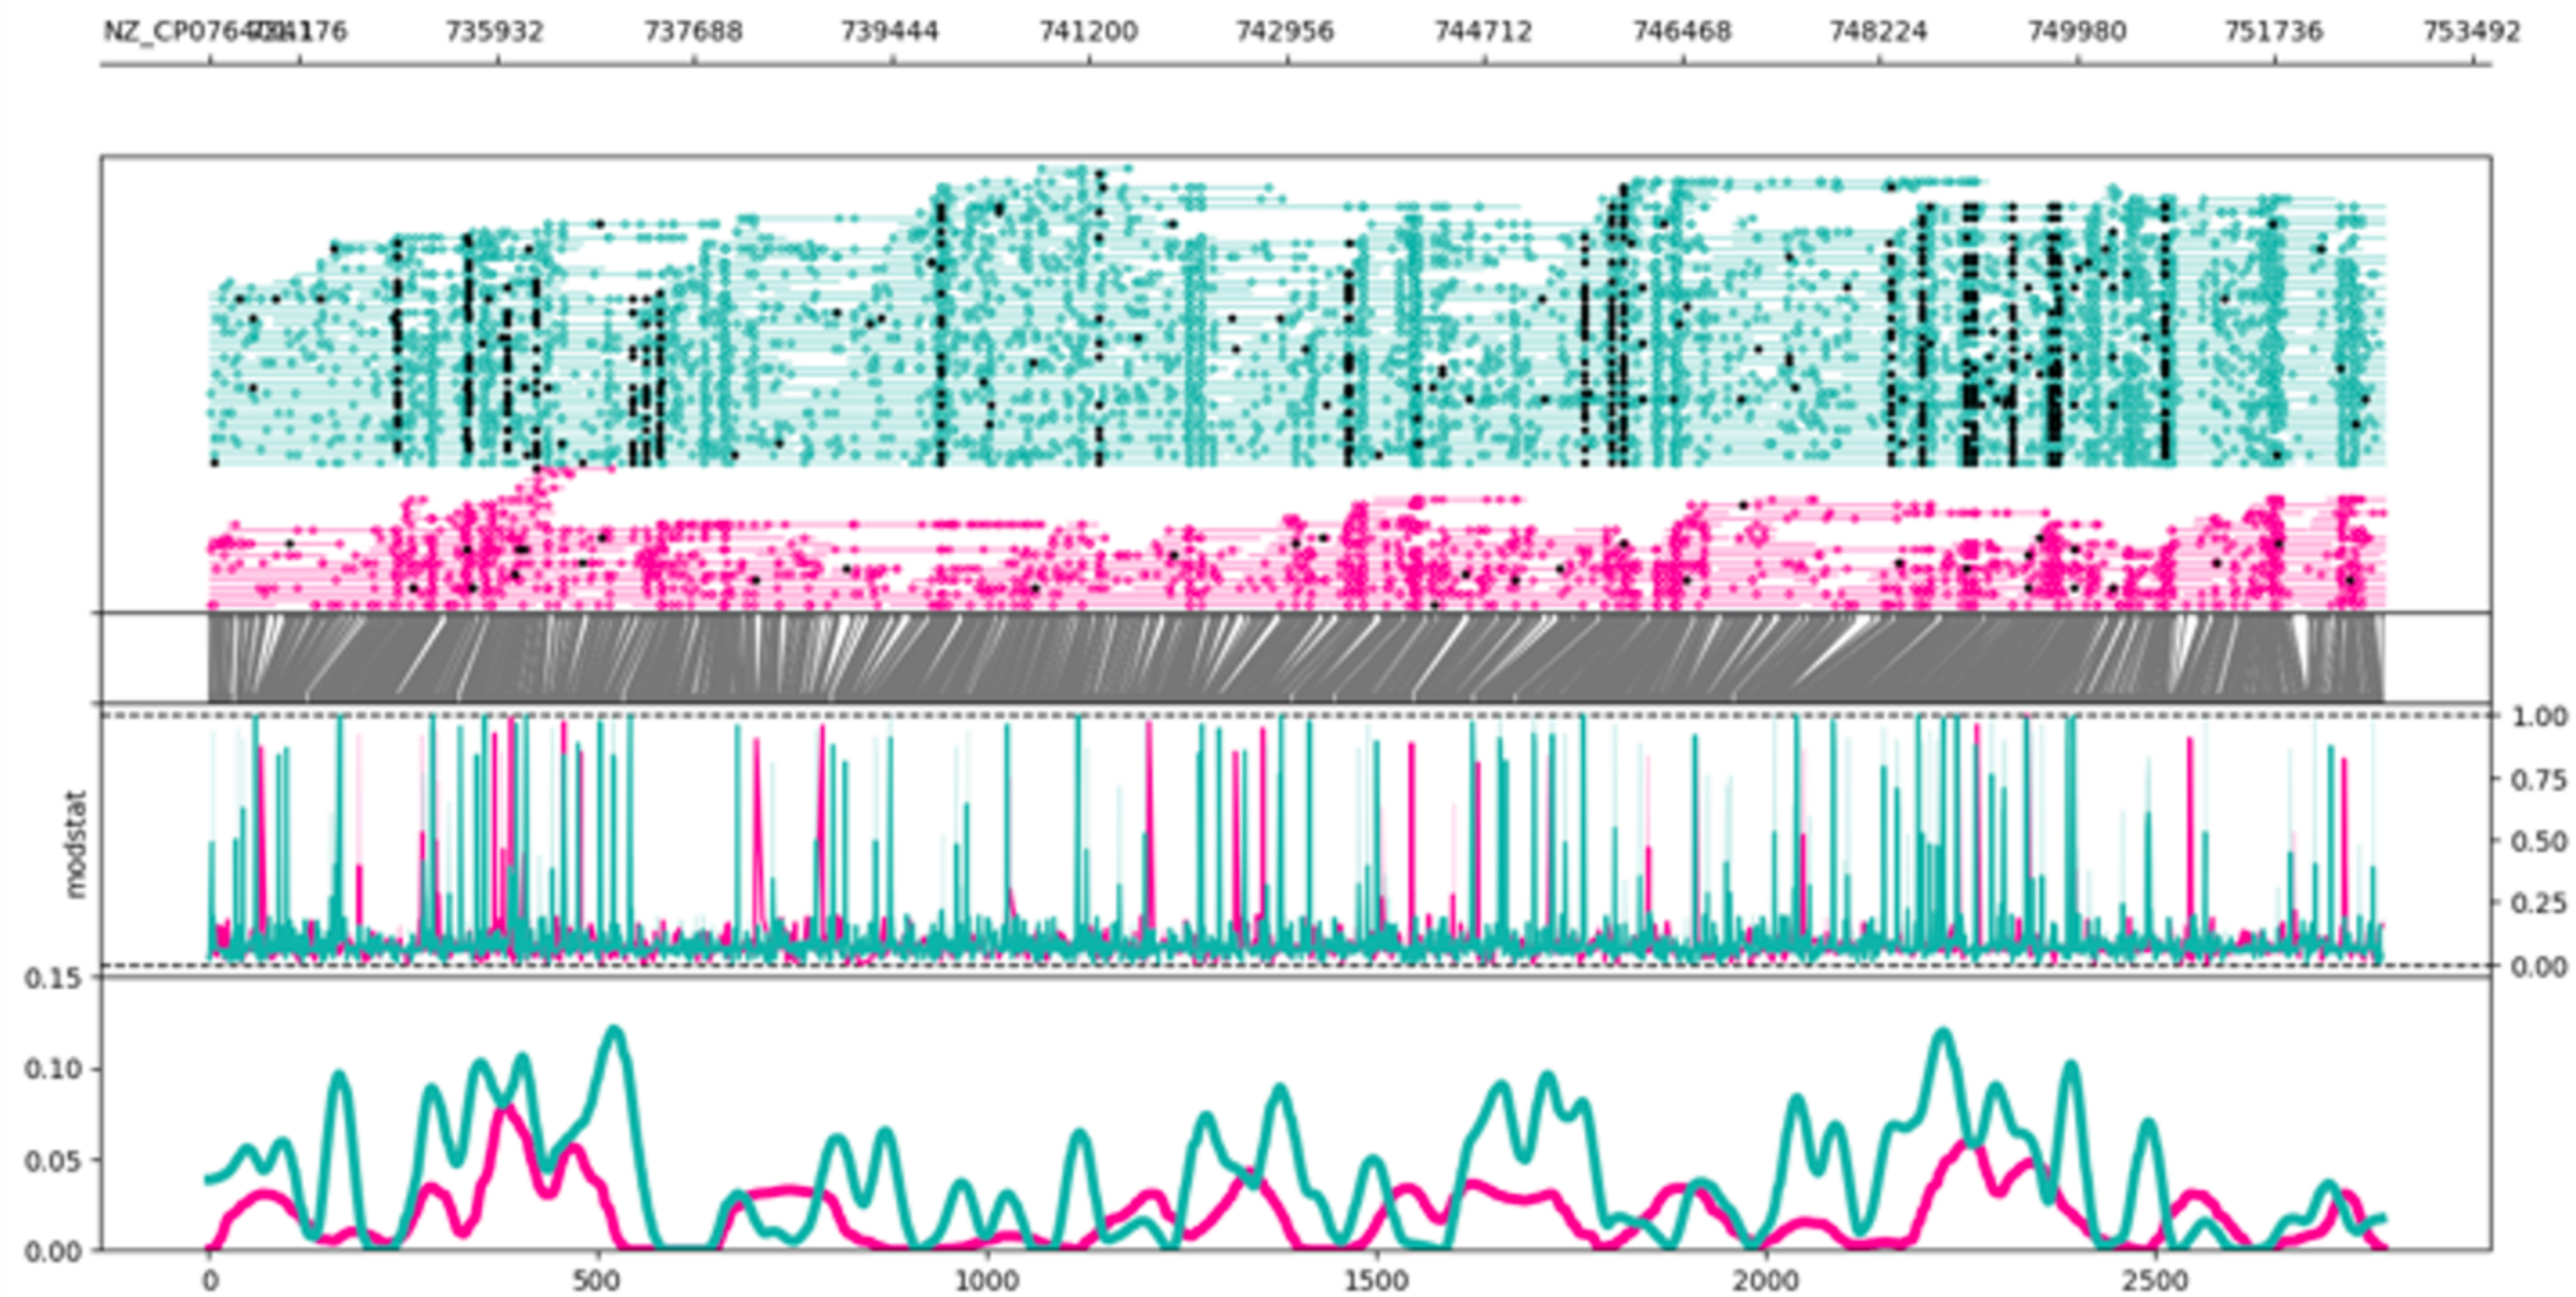

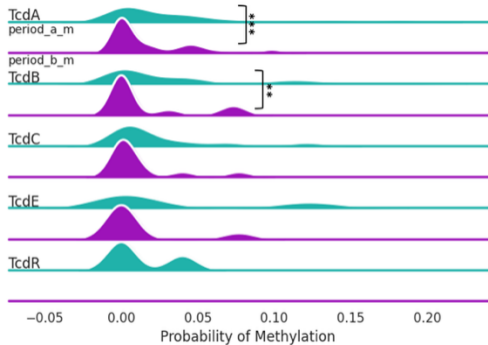

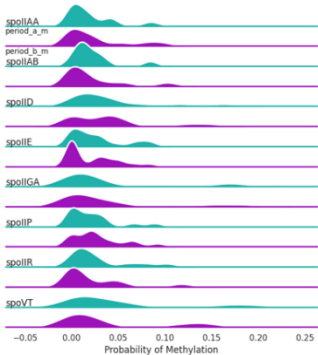

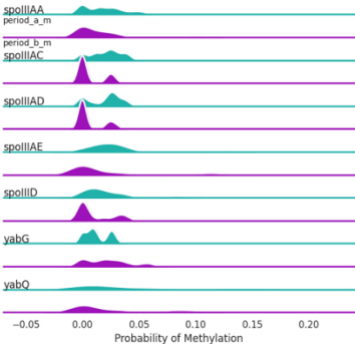

Supplement: Supplementary file 1 [file 3f8a01eab02efdf4e70e7519.pdf]
